# Supplementary material for: Cu–Cd–Zn–S/ZnS core/shell quantum dot/polyvinyl alcohol flexible films for white light-emitting diodes
Source: Royal Society of Chemistry journal article supplement (doi:10.1039/d0ra03540h), 2020-01-01
Supplement: d0ra03540h1.pdf [file d0ra03540h1.pdf]

## Cu-Cd-Zn-S/ZnS Core/Shell Quantum Dot/Polyvinyl Alcohol Flexible Films for White Light-Emitting Diodes

Shenjie Li,\* Tianyong Zha, Xiaoyu Gong, Minghui Yu, Qi Hu, Jinyu Wu, Ruolan Li, Jiaming Wang, and Yanyan Chen\*

*School of Chemistry and Chemical Engineering, HeFei University of Technology, Hefei, Anhui, 230009, People's Republic of China*

Tel & Fax: +86-563-3831302;

Email: shenjieli@hfut.edu.cn; yanyanchen@hfut.edu.cn;

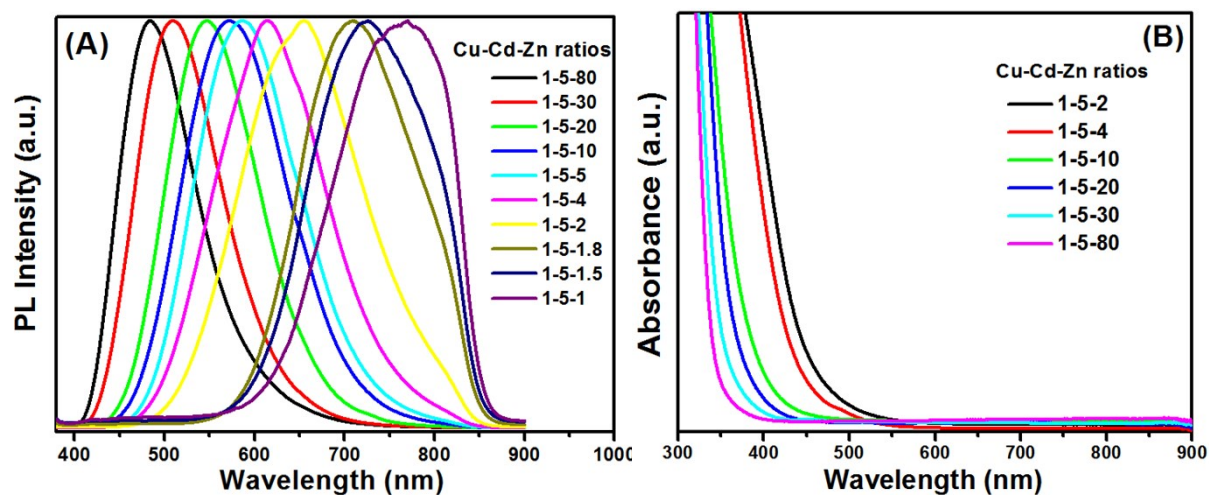

**Figure S1.** PL spectra and UV-vis absorption of Cu-Cd-ZnS QDs synthesized under different Zn content.

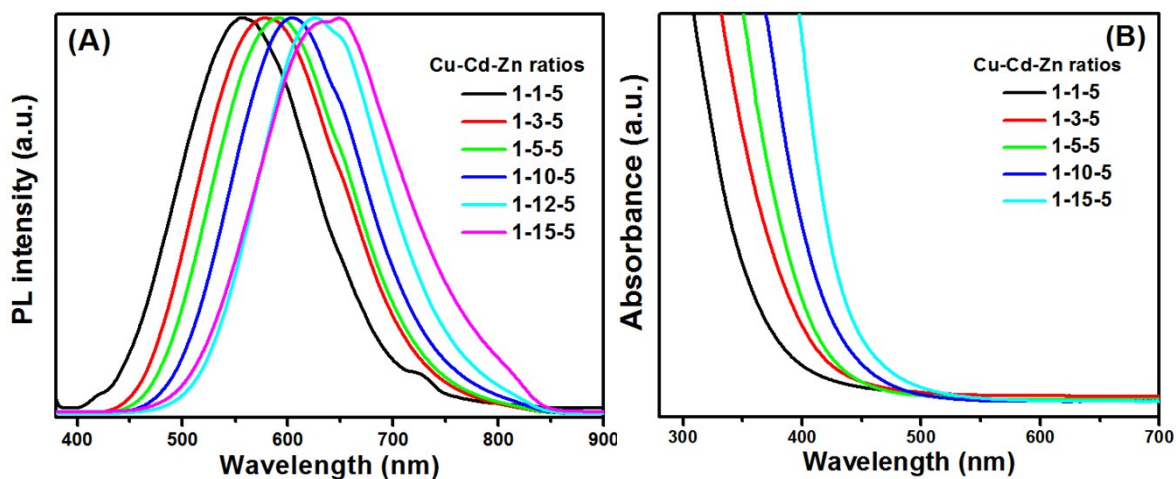

**Figure S2.** PL spectra and UV-vis absorption of Cu-Cd-ZnS QDs synthesized under different Cd content.

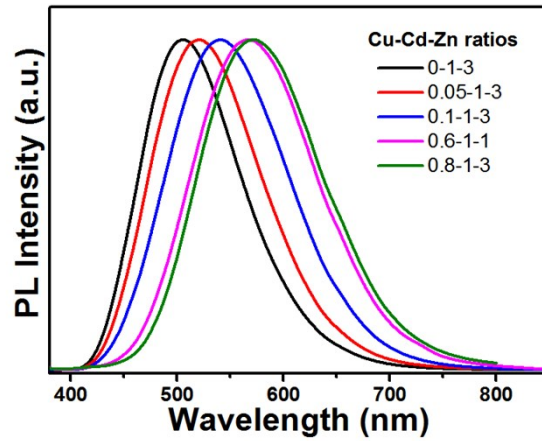

**Figure S3.** PL spectra of Cu-Cd-ZnS QDs synthesized under different Cu content.

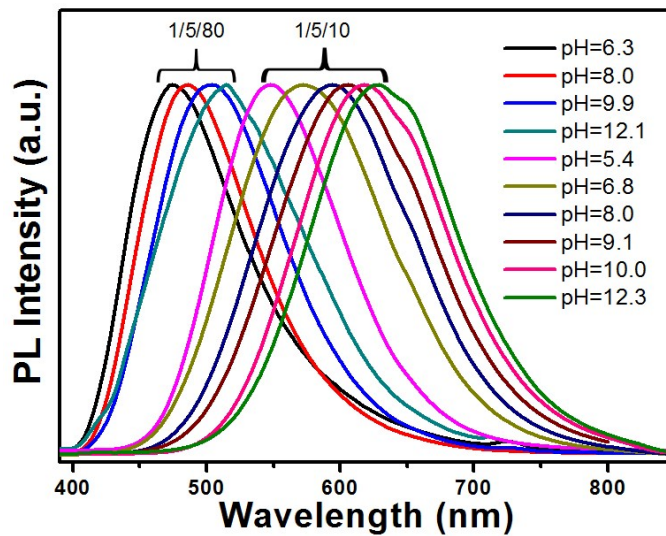

**Figure S4.** PL emission spectra of Cu-Cd-Zn-S QDs with the Cu/Cd/Zn ratios of 1:5:10 and 1:5:80 as well as different pH values.

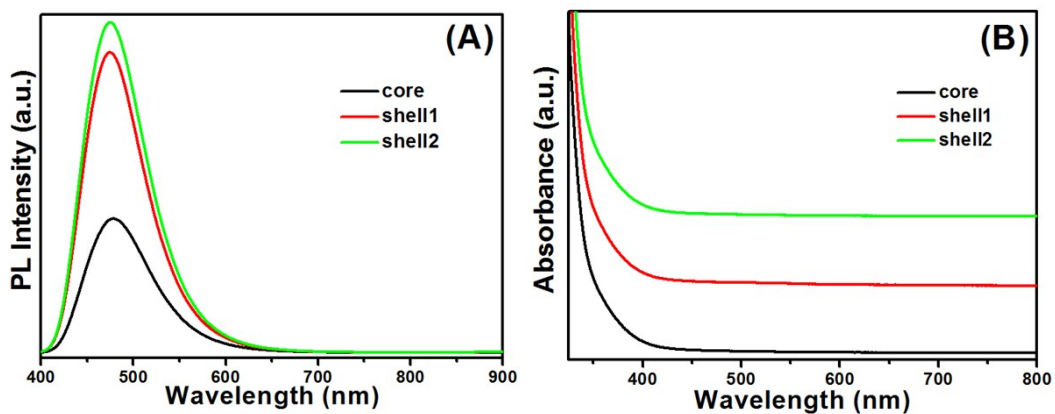

**Figure S5.** PL spectra (A) and UV-vis absorption spectra (B) of Cu-Cd-Zn-S/ZnS core/shell QDs with the deposition of different thickness ZnS shell around the core QDs.

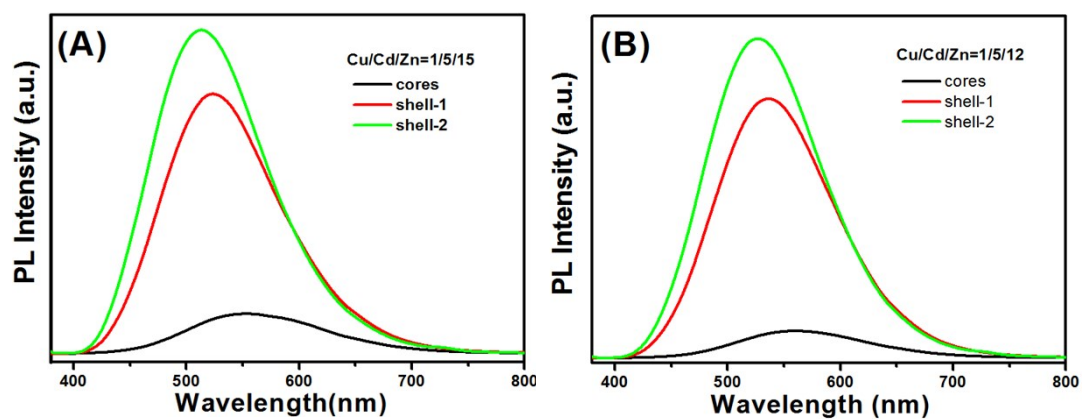

**Figure S6.** PL emission spectra of Cu-Cd-Zn-S/ZnS core/shell QDs with the deposition of different thickness ZnS shell around the core QDs.

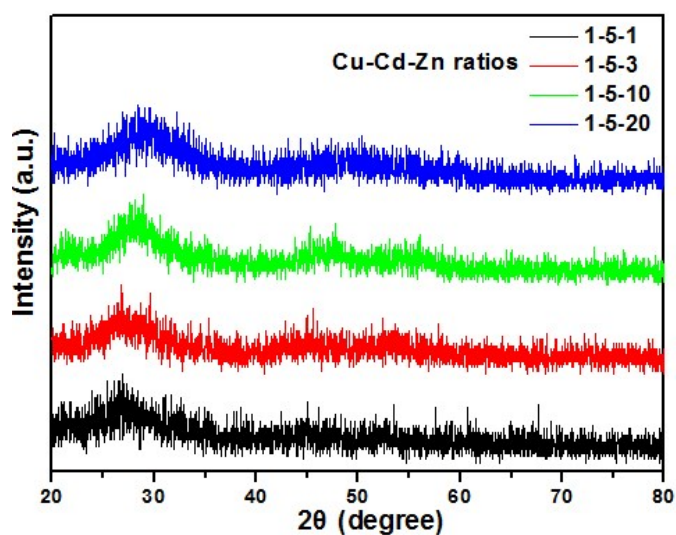

**Figure S7.** XRD patterns of Cu-Cd-Zn-S QDs with different Cu/Cd/Zn ratios.

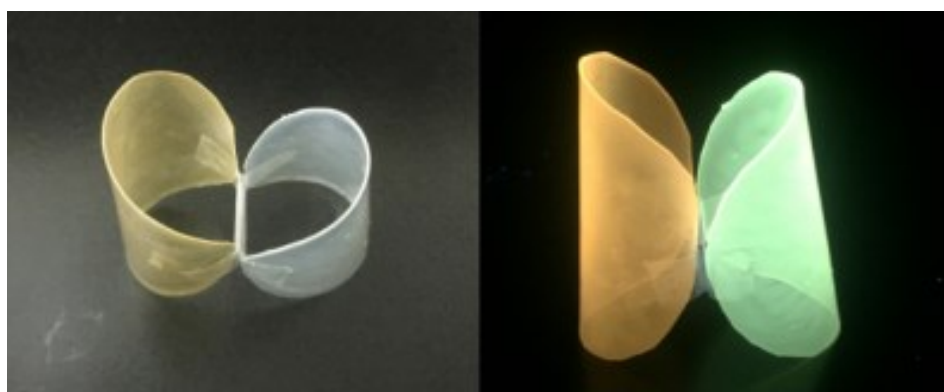

**Figure S8.** The photographs of flexible hybrid QD/PVA films bent under sunlight (left) and UV irradiation (right).

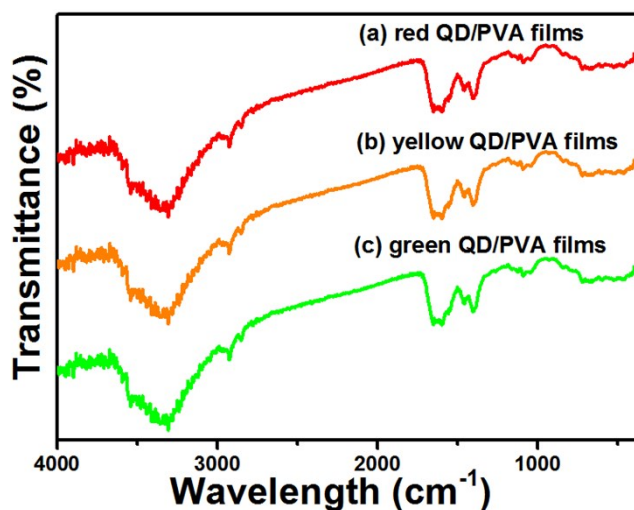

Figure S9. FT-IR spectra of (a) red (b) yellow (c) green QD/PVA flexible films.

Table S1. Double-exponential fitting results for PL decay profiles of Cu-Cd-Zn-S and Cu-Cd-Zn-S/ZnS core/shell QDs with Cu/Cd/Zn ratio of 1/5/10.

| QDs   | A <sub>1</sub> | τ <sub>1</sub> | A <sub>2</sub> | τ <sub>2</sub> | Lifetime (ns) |
|-------|----------------|----------------|----------------|----------------|---------------|
| core  | 1974.2         | 56.2           | 521.1          | 784.9          | 629.5         |
| shell | 969.4          | 87.1           | 529.0          | 904.8          | 782.1         |

Table S2. EDS results (atomic percent) of Cu-Cd-Zn-S core QDs with different Cu/Cd/Zn ratios.

| Cu/Cd/Zn ratios | Cu% | Cd%  | Zn%  | S%   |
|-----------------|-----|------|------|------|
| 1/5/1           | 7.0 | 34.3 | 8.4  | 50.3 |
| 1/5/1.8         | 6.5 | 32.5 | 11.6 | 49.5 |
| 1/5/3           | 5.8 | 28.2 | 17.1 | 48.9 |
| 1/5/5           | 4.2 | 22.7 | 20.5 | 52.7 |
| 1/5/10          | 2.9 | 15.3 | 28.1 | 53.6 |
| 1/5/15          | 2.2 | 11.2 | 37.9 | 48.6 |
| 1/5/20          | 1.9 | 12.1 | 38.1 | 47.9 |
| 1/5/30          | 1.5 | 7.5  | 39.2 | 51.7 |
| 1/5/80          | 0.7 | 3.3  | 45.4 | 50.6 |
